# Supplementary material
Source: PubMed Central journal article supplement (PMC5877318)

A

Structure of ZF2-11 – Crystallographic HEAT map

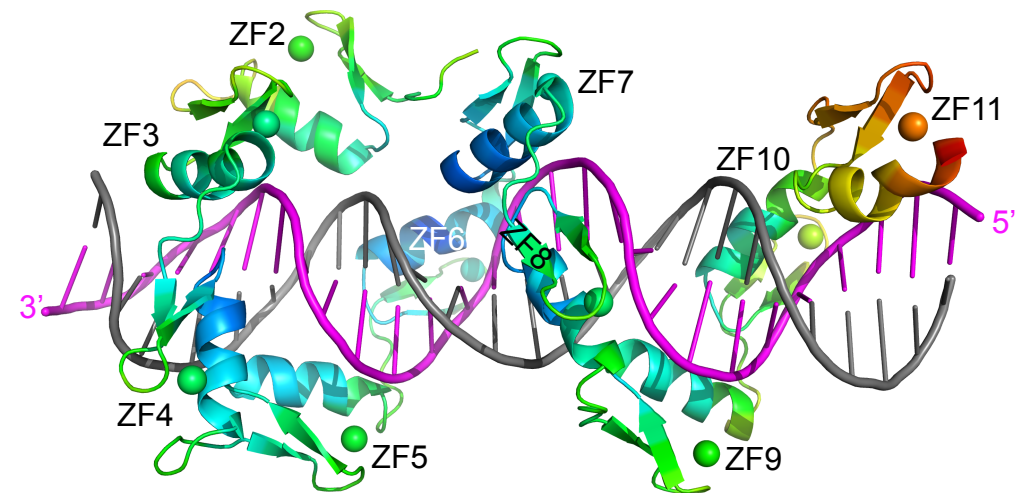

B

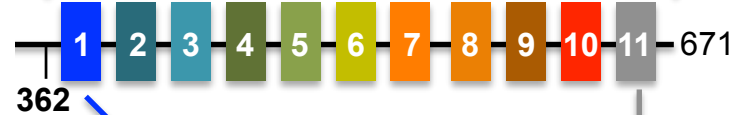RMSD=0.7 Å  
for 222 Cα atomsrainbow: ZF1-10  
grey: ZF2-11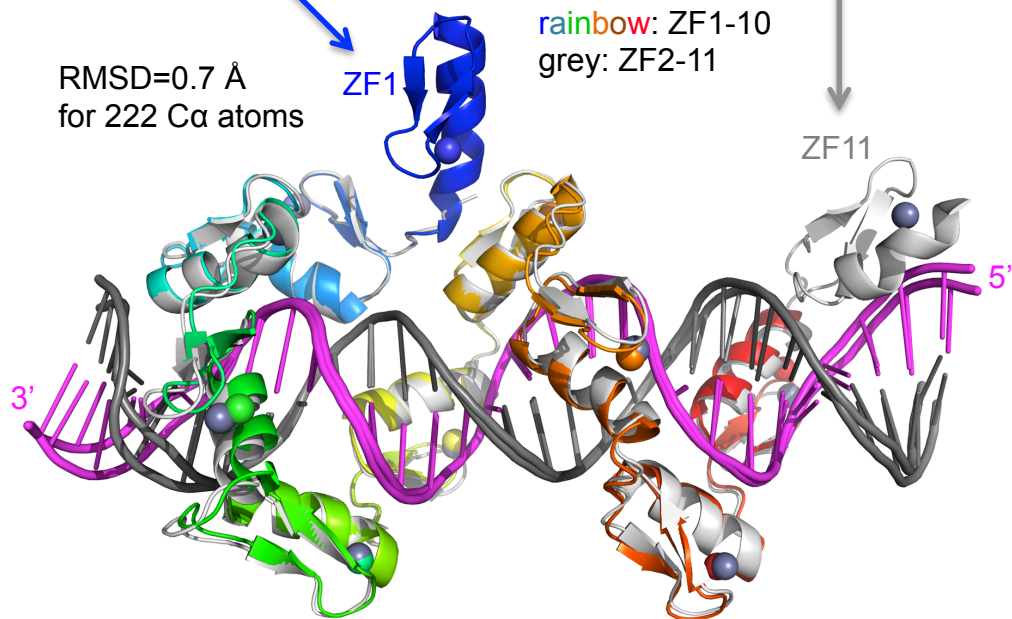

C

Two identical, symmetry-related  
complexes in space group  $C222_1$ 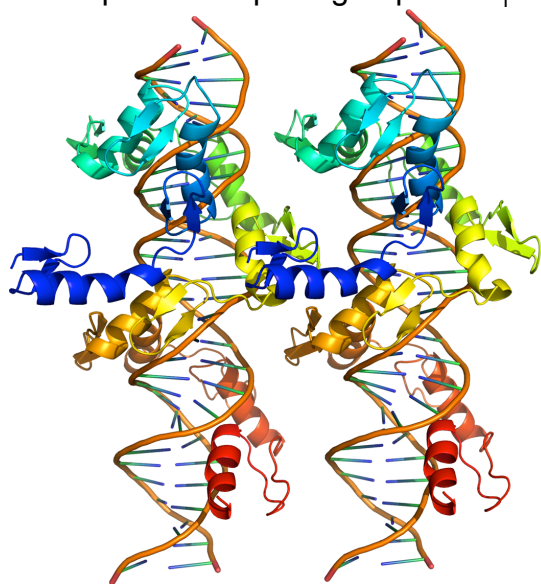

D

Two complexes in space group  $P1$ 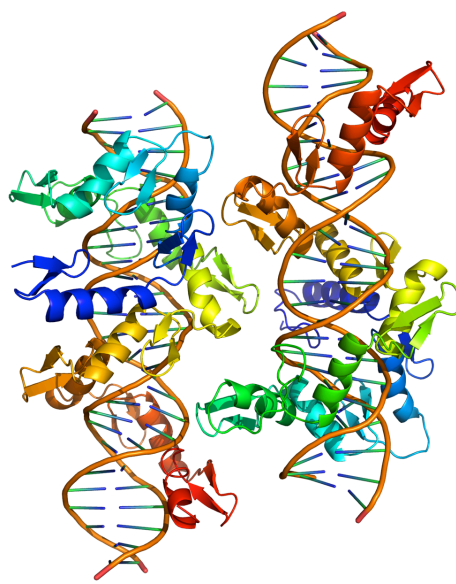

E

RMSD<1.0 Å  
for 231 Cα atoms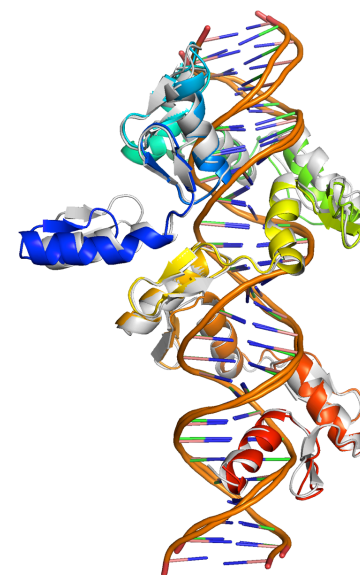

Supplement: NIHMS947537-supplement-2.pdf [file NIHMS947537-supplement-2.pdf]
