# Supplementary material
Source: PubMed Central journal article supplement (PMC5877318)
Supplement: NIHMS947537-supplement-4.pdf [file NIHMS947537-supplement-4.pdf]

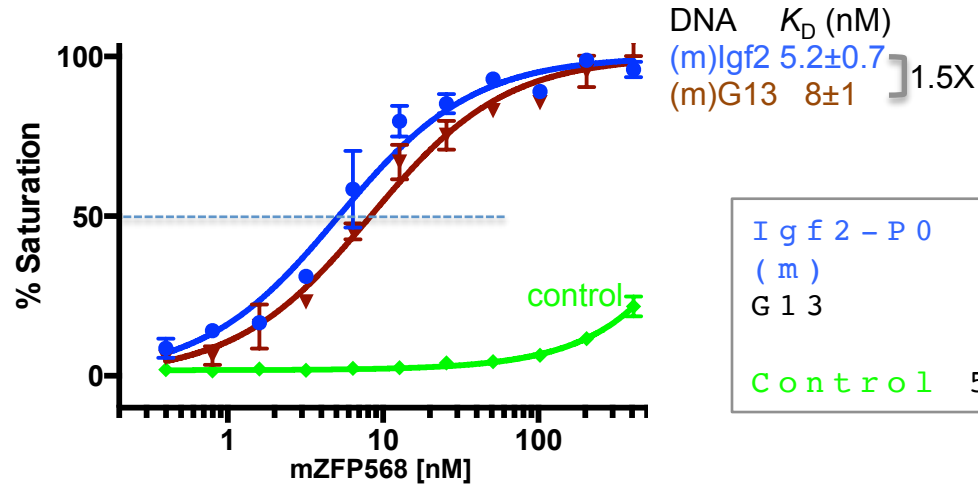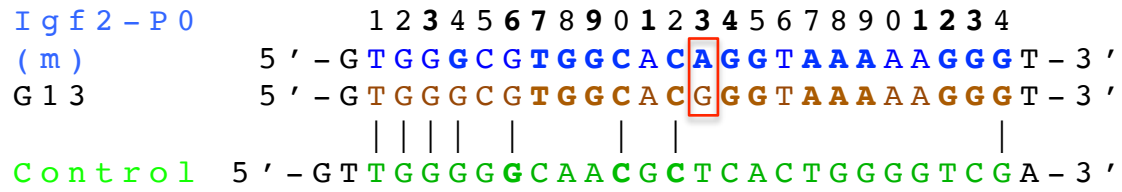

## MODEL 1

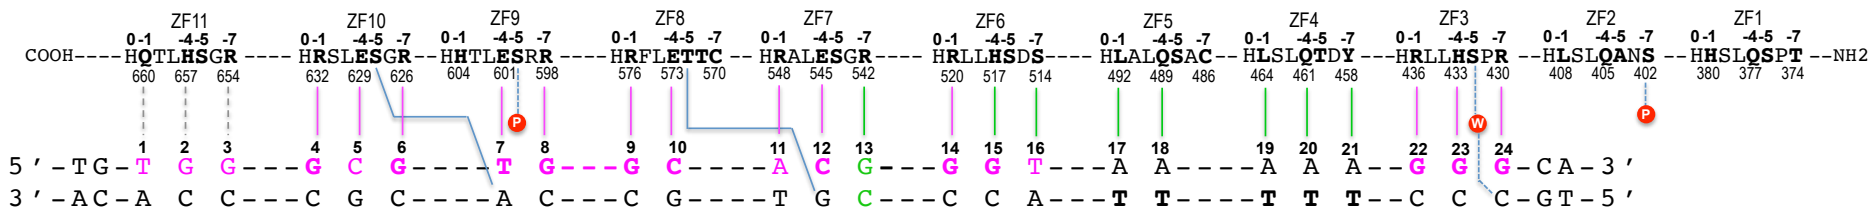

Changing A:T base pair to G:C at position 13. If the arrangement involves significant gross change between protein-DNA interactions (shown in green lines between ZF4-7), the prediction would be that a large affinity change will be observed.

## MODEL 2

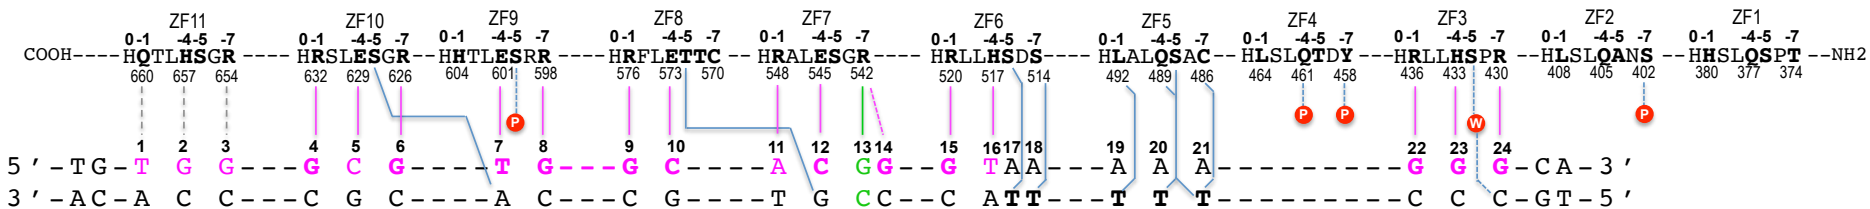

If the local rearrangement occurs only at base pair position 13, the prediction would be small or no affinity changes. The Arg542 could have alternative conformations to interact with either Gua at positions 13 or 14 (see Figure 4X).
