# Supplementary material
Source: PubMed Central journal article supplement (PMC5877318)
Supplement: NIHMS947537-supplement-7.pdf [file NIHMS947537-supplement-7.pdf]

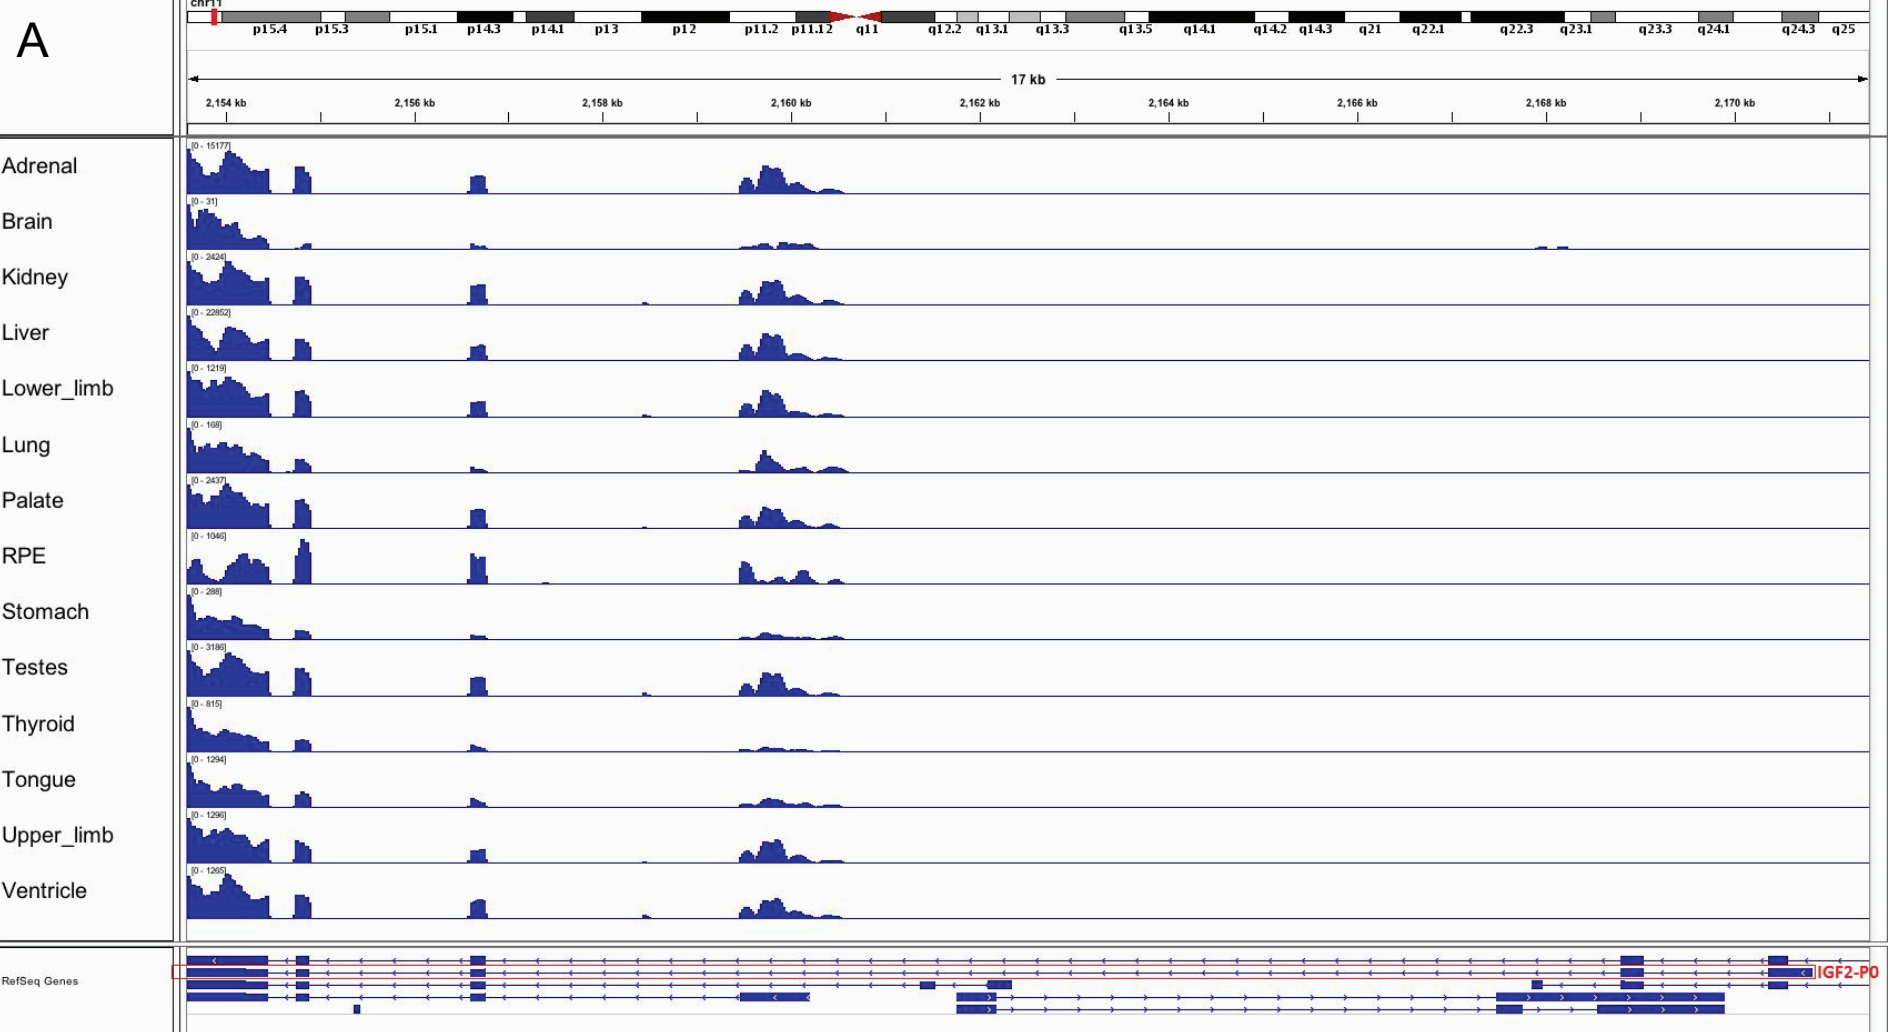

**B** Igf2-P0-promoter sequence

ZFP568 binding site

-----

Human -----CCCCCGCCATTTTACCAGTGGCCAGTCCACCAACATTCCAGGGTGTCAAGTAACTGCCAAGTGTCACTCTAAGTAAAGCTACACCCACTCCCACCACCTCCACATAGCCCCACCTCCTAGCTGG

Chimp -----CCCCCGCCATTTTACCAGTGGCCAGTCCACCAACATTCCAGGGTGTCAAGTAACTGCCAAGTGTCACTCTAAGTAAAGCTACACCCACTCCCACCACCTCCACATAGCCCCACCTCCTAGCTGG

Rhesus -----TATTCCTCCACCATTTTACCAGTGGCCAGGCCACCAACATTCCAGGGTGTCAAGTAACTGCCAAGTGTCACTCTAAGTAAAGCTACACCCACTCCCACCACCTCCACATAGCCCCACCTCCTAGCTGG

Mouse CTAATTTGCATTAAGCCACGCCCTTTTACCCTGTGCCACGCCACAGACATATCCAGGGTGTCAAGTAACTGCCAAGTGTCACTCTAAGTAAAGCTACACCCACTCCCACCACCTCCACATAGCCCCACCTCCTAGCTAA

Human CAGGGA--GCTTCTGGCTT-ATGCCACGCCACAGGCGCCTTTCTGCCAGGTGAGGGGTGGGCCAAACCTCCACCCGCTAATGTACC-ATGCCCTGGTGTGGAAAGTGCTGAGCCAGCTGCCCCAGCGGCCTCAGCAC

Chimp CAGGGA--GCTTCTGGCTT-ATGCCACGCCACAGGCGCCTTTCTGCCAGGTGAGGGGTGGGCCAAACCTCCACCCCTAATGTACC-ATGCCCTGGTGTGGAAAGTGCTGAGCCAGCTGCCCCAGCGGCCTCAGCAC

Rhesus CAGGGG--GCTTCTGGCTT-ATACCCACGCCACAGGCGCCTTTCTGCCAGGTGAGGGTGGGCCAAACCTCCATCCCCTAATGTACC-ATGCCCTGGTGTGGAAAGTGCTGAGCCAGCTGCCCCAGCGGCCTCAGCAC

Mouse CAGGAAGTGCTTCTAGCTTAATTCAAACCTGCATAGACGCCTTCTGTCT-GTCAGGCAGGGGCCAAAGCCACCCCTCTAATGCCCCATACCTAGTGTGGGAAAGCGCCATAGCCAGCTGCCCCATAGTCTTTGCAG

Human TACCAAGTTGGCACAAGCTCCCAAATTCGGAGGGGCTCAGGGAACGAGTGGAGGGGATGAGGAGGTGAGGGGTAAACCCATCATTTTCAGTTGGCATTGAGCAGGTGCCATGCTCAGC--AAGCTTGGCATTCCGGTA

Chimp TACCAAGTTGGCACAAGCTCCCAAATTCGGAGGGGCTCAGGGAACGAGTGGAGGGGATGAGGAGGTGAGGGGTAAACCCATCATTTTCAGTTGGCATTGAGCAGGTGCCATGCTCAGC--AAGCTTGGCATTCCGGTA

Rhesus TACCAAGTTGGCACAAGCTCCCAAATTCGGAGGGGCTCAGGGAACGAGTGGAGGGGATGAGGAGGTGAGGGGTAAACCCATCATTTTCAGTTGGCATTGAGCAGGTGCCATGCTCAGC--AAGCTTGGCATTCCGGTA

Mouse TACTTTTACCTGGCATATCATTTCCAAATTCGGAGGGGCTCGAAGTGGCGTGGAGGGGACGAGGTG--AGGGATAAAAGCGT-----GGTGTCAATTCGAGCAGGTGCCATTACTCAGTGGAAAGCTTGGCATTCCGGTA
