# Supplementary material
Source: PubMed Central journal article supplement (PMC5877318)
Supplement: NIHMS947537-supplement-9.pdf [file NIHMS947537-supplement-9.pdf]

Table S2, Related to Figures 3 and 4. Summary of X-ray data collection from SERCAT 22-ID beamline and refinement statistics (\*)

| <b>mZFP568</b>                                                  | ZF1-11 (ZF11 was not observed) | ZF1-10                     | ZF2-11                           |
|-----------------------------------------------------------------|--------------------------------|----------------------------|----------------------------------|
| <b>DNA (mIgf2-P0) (5'-3')</b>                                   | TGCCCTTTTTTACCTGTGCCACGCCACA   | GCCCTTTTTTACCTGTGCCACGCCAC | TGCCCTTTTTTACCTGTGCCACGCCACA     |
| <b>(3'-5')</b>                                                  | ACGGGAAAAATGGACACGGTGCGGGTGT   | CGGGAAAAATGGACACGGTGCGGGTG | ACGGGAAAAATGGACACGGTGCGGGTGT     |
| <b>PDB</b>                                                      | 5V3M                           | 5V3J                       | 5WJQ                             |
| <b>Space group</b>                                              | C222 <sub>1</sub>              | P1                         | P2 <sub>1</sub> 2 <sub>1</sub> 2 |
| <b>Cell dimensions a, b, c (Å)</b>                              | 34.9, 92.7, 353.6              | 55.8, 65.7, 73.0           | 180.7, 35.2, 81.9                |
| <b><math>\alpha, \beta, \gamma</math> (°)</b>                   | 90, 90, 90                     | 100.5, 104.2, 97.2         | 90, 90, 90                       |
| <b>Resolution (Å)</b>                                           | 32.2-2.09 (2.16-2.09)          | 34.5-2.06 (2.13-2.06)      | 39.9-2.79 (2.89-2.79)            |
| <sup>a</sup> R <sub>merge</sub>                                 | 0.067 (0.479)                  | 0.076 (0.764)              | 0.132 (0.596)                    |
| <sup>b</sup> I/ $\sigma$ I                                      | 26 (2.6)                       | 12.9 (1.9)                 | 17.6 (4.5)                       |
| CC <sub>1/2</sub> / CC                                          | (0.910 / 0.976)                | (0.941 / 0.985)            | (0.933 / 0.983)                  |
| <b>Completeness (%)</b>                                         | 81.7 (32.9)                    | 97.9 (96.6)                | 99.9 (100)                       |
| <b>Redundancy</b>                                               | 13.9 (6.8)                     | 4.4 (4.3)                  | 13.7 (13.5)                      |
| <b>Observed reflections</b>                                     | 408,866                        | 254,225                    | 188,742                          |
| <b>Unique reflections</b>                                       | 29,385 (1,160)                 | 58,341 (5,723)             | 13,731 (1,328)                   |
| <b>Bijvoet pairs (I<sup>+</sup> and I)</b>                      | 14,406                         | -                          | -                                |
| <b>Mean FOM (Zn-SAD)</b>                                        | 0.414                          | -                          | -                                |
| <b>Refinement</b>                                               |                                |                            |                                  |
| <b>Resolution (Å)</b>                                           | 2.09                           | 2.06                       | 2.79                             |
| <b>No. reflections</b>                                          | 29,248                         | 58,177                     | 13,562                           |
| <sup>c</sup> R <sub>work</sub> / <sup>d</sup> R <sub>free</sub> | 0.213 / 0.253                  | 0.192 / 0.237              | 0.192 / 0.263                    |
| <b>No. Atoms</b>                                                |                                |                            |                                  |
| Protein                                                         | 2,079                          | 4,228                      | 2,137                            |
| DNA                                                             | 1,142                          | 2,123                      | 1,142                            |
| Zn                                                              | 10                             | 20                         | 10                               |
| Water                                                           | 139                            | 358                        | 31                               |
| <b>B Factors (Å<sup>2</sup>)</b>                                |                                |                            |                                  |
| Protein                                                         | 74.2                           | 61.2                       | 69.1                             |
| DNA                                                             | 73.5                           | 58.1                       | 56.4                             |
| Zn                                                              | 82.2                           | 59.5                       | 76.0                             |
| Water                                                           | 47                             | 46.3                       | 44.1                             |
| <b>R.m.s. deviations</b>                                        |                                |                            |                                  |
| Bond lengths (Å)                                                | 0.025                          | 0.008                      | 0.008                            |
| Bond angles (°)                                                 | 1.1                            | 1.05                       | 1.0                              |
| All atom clash score                                            | 11.9                           | 6.7                        | 11.1                             |
| Ramachandran plot (%)                                           |                                |                            |                                  |
| favored                                                         | 94.9                           | 98                         | 92.8                             |
| allowed                                                         | 5.1                            | 2                          | 7.2                              |
| C $\beta$ deviation                                             | 0                              | 0                          | 0                                |

\* Values in parenthesis correspond to highest resolution shell; <sup>a</sup> R<sub>merge</sub> =  $\sum |I - \langle I \rangle| / \sum I$ , where I is the observed intensity and  $\langle I \rangle$  is the averaged intensity from multiple observations; <sup>b</sup>  $\langle I / \sigma I \rangle$  = averaged ratio of the intensity (I) to the error of the intensity ( $\sigma I$ ); <sup>c</sup> R<sub>work</sub> =  $\sum |F_{obs} - F_{cal}| / \sum |F_{obs}|$ , where F<sub>obs</sub> and F<sub>cal</sub> are the observed and calculated structure factors, respectively; <sup>d</sup> R<sub>free</sub> was calculated using a randomly chosen subset (5%) of the reflections not used in refinement; Wavelength=1.0 Å

**Table S3, Related to Figure 5. DNA Minor and major groove widths**

\*\*\*\*\*  
 Program 3DNA v2.0  
 \*\*\*\*\*  
 Minor and major groove widths: direct P-P distances and refined P-P  
 distances which take into account the directions of the sugar-  
 phosphate backbones

Ref: M. A. El Hassan and C. R. Calladine (1998). Two Distinct Modes of  
 Protein-induced Bending in DNA. J. Mol. Biol., v282, pp331-343.

\*\*\*\*\*  
 File name: 5V3M.pdb (ZF1-11 in complex with 28-bp DNA)  
 \*\*\*\*\*

|          | Minor Groove |         | Major Groove |         |
|----------|--------------|---------|--------------|---------|
|          | P-P          | Refined | P-P          | Refined |
| 1 TG/CA  | ---          | ---     | ---          | ---     |
| 2 GT/AC  | ---          | ---     | ---          | ---     |
| 3 TG/CA  | 12.8         | ---     | 18.5         | ---     |
| 4 GG/CC  | 13.5         | 13.5    | 17.5         | 17.4    |
| 5 GG/CC  | 13.4         | 13.2    | 16.7         | 16.7    |
| 6 GC/GC  | 13.5         | 13.3    | 15.3         | 15.0    |
| 7 CG/CG  | 13.6         | 13.5    | 16.1         | 15.1    |
| 8 GT/AC  | 12.2         | 12.1    | 19.6         | 19.1    |
| 9 TG/CA  | 11.3         | 11.1    | 19.4         | 19.2    |
| 10 GG/CC | 12.4         | 12.2    | 16.4         | 16.1    |
| 11 GC/GC | 14.3         | 13.9    | 16.3         | 15.4    |
| 12 CA/TG | 14.7         | 14.3    | 19.5         | 18.8    |
| 13 AC/GT | 13.7         | 13.6    | 21.3         | 21.1    |
| 14 CA/TG | 13.4         | 13.2    | 21.5         | 21.5    |
| 15 AG/CT | 13.5         | 13.3    | 19.4         | 19.3    |
| 16 GG/CC | 12.2         | 12.1    | 16.2         | 15.9    |
| 17 GT/AC | <b>10.2</b>  | 10.1    | 17.6         | 17.6    |
| 18 TA/TA | <b>9.3</b>   | 9.3     | 17.8         | 17.8    |
| 19 AA/TT | <b>8.9</b>   | 8.9     | 16.7         | 16.7    |
| 20 AA/TT | <b>9.2</b>   | 9.2     | 19.0         | 19.0    |
| 21 AA/TT | <b>9.2</b>   | 9.2     | 18.4         | 18.4    |
| 22 AA/TT | <b>8.7</b>   | 8.7     | 17.4         | 17.4    |
| 23 AG/CT | <b>9.1</b>   | 9.1     | 20.4         | 20.4    |
| 24 GG/CC | <b>10.7</b>  | 10.7    | 16.3         | 16.2    |
| 25 GG/CC | 12.8         | ---     | 13.7         | ---     |
| 26 GC/GC | ---          | ---     | ---          | ---     |
| 27 CA/TG | ---          | ---     | ---          | ---     |

\*\*\*\*\*

**Table S3 - Continues**

\*\*\*\*\*  
 File name: 5WJQ.PDB (ZF2-11 in complex with 28-bp DNA)  
 \*\*\*\*\*

|          | Minor Groove |         | Major Groove |         |
|----------|--------------|---------|--------------|---------|
|          | P-P          | Refined | P-P          | Refined |
| 1 TG/CA  | ---          | ---     | ---          | ---     |
| 2 GT/AC  | ---          | ---     | ---          | ---     |
| 3 TG/CA  | 13.7         | ---     | 18.8         | ---     |
| 4 GG/CC  | 13.6         | 13.5    | 18.6         | 18.1    |
| 5 GG/CC  | 13.4         | 13.2    | 16.5         | 16.3    |
| 6 GC/GC  | 13.3         | 13.1    | 14.7         | 14.5    |
| 7 CG/CG  | 13.4         | 13.2    | 15.7         | 15.1    |
| 8 GT/AC  | 12.9         | 12.8    | 18.7         | 18.4    |
| 9 TG/CA  | 12.6         | 12.4    | 19.6         | 19.2    |
| 10 GG/CC | 13.4         | 13.1    | 16.7         | 16.2    |
| 11 GC/GC | 14.6         | 14.1    | 16.6         | 15.6    |
| 12 CA/TG | 14.5         | 14.1    | 19.2         | 18.5    |
| 13 AC/GT | 13.4         | 13.2    | 21.4         | 21.3    |
| 14 CA/TG | 13.1         | 12.9    | 22.0         | 22.0    |
| 15 AG/CT | 13.3         | 13.2    | 19.7         | 19.6    |
| 16 GG/CC | 12.7         | 12.7    | 16.2         | 15.9    |
| 17 GT/AC | <b>10.9</b>  | 10.9    | 17.8         | 17.8    |
| 18 TA/TA | <b>9.6</b>   | 9.6     | 17.8         | 17.8    |
| 19 AA/TT | <b>9.3</b>   | 9.2     | 18.6         | 18.6    |
| 20 AA/TT | <b>9.1</b>   | 9.1     | 19.0         | 19.0    |
| 21 AA/TT | <b>8.8</b>   | 8.8     | 18.8         | 18.8    |
| 22 AA/TT | <b>8.9</b>   | 8.8     | 19.7         | 19.7    |
| 23 AG/CT | <b>10.6</b>  | 10.5    | 22.1         | 21.6    |
| 24 GG/CC | 12.9         | 12.8    | 18.4         | 17.5    |
| 25 GG/CC | 13.9         | ---     | 17.6         | ---     |
| 26 GC/GC | ---          | ---     | ---          | ---     |
| 27 CA/TG | ---          | ---     | ---          | ---     |

\*\*\*\*\*

**Table S3 - Continues**

\*\*\*\*\*  
 File name: 5V3J.pdb (ZF1-10 in complex with 26-bp DNA)  
 Note: 2 protein-DNA complexes per crystallographic asymmetric unit  
 \*\*\*\*\*

|          | Minor Groove |         | Major Groove |         |
|----------|--------------|---------|--------------|---------|
|          | P-P          | Refined | P-P          | Refined |
| 3 GG/CC  | 12.4         | ---     | 17.2         | ---     |
| 4 GG/CC  | 13.2         | 13.1    | 16.2         | 16.1    |
| 5 GC/GC  | 14.0         | 13.8    | 16.4         | 16.1    |
| 6 CG/CG  | 13.4         | 13.3    | 15.3         | 14.4    |
| 7 GT/AC  | 11.6         | 11.6    | 17.7         | 17.3    |
| 8 TG/CA  | 10.6         | 10.5    | 17.1         | 17.0    |
| 9 GG/CC  | 12.2         | 12.0    | 15.9         | 15.7    |
| 10 GC/GC | 14.6         | 14.4    | 16.0         | 14.8    |
| 11 CA/TG | 15.5         | 15.2    | 18.4         | 17.6    |
| 12 AC/GT | 14.5         | 14.1    | 21.1         | 21.0    |
| 13 CA/TG | 13.9         | 13.5    | 21.6         | 21.6    |
| 14 AG/CT | 14.8         | 14.6    | 19.5         | 19.4    |
| 15 GG/CC | 14.1         | 14.0    | 15.8         | 15.5    |
| 16 GT/AC | <b>11.0</b>  | 11.0    | 17.5         | 17.5    |
| 17 TA/TA | <b>9.3</b>   | 9.3     | 18.2         | 18.2    |
| 18 AA/TT | <b>9.0</b>   | 8.9     | 17.1         | 17.1    |
| 19 AA/TT | <b>9.3</b>   | 9.3     | 19.5         | 19.4    |
| 20 AA/TT | <b>9.0</b>   | 9.0     | 19.3         | 19.3    |
| 21 AA/TT | <b>8.9</b>   | 8.9     | 19.4         | 19.3    |
| 22 AG/CT | <b>9.9</b>   | 9.9     | 21.8         | 21.7    |
| 23 GG/CC | 12.1         | ---     | 17.8         | ---     |
| 3 GG/CC  | 13.3         | ---     | 16.6         | ---     |
| 4 GG/CC  | 13.4         | 13.3    | 17.7         | 17.5    |
| 5 GC/GC  | 14.2         | 14.1    | 17.0         | 16.7    |
| 6 CG/CG  | 14.0         | 13.9    | 15.4         | 14.3    |
| 7 GT/AC  | 11.9         | 11.8    | 17.5         | 17.0    |
| 8 TG/CA  | 10.7         | 10.5    | 17.2         | 17.1    |
| 9 GG/CC  | 12.2         | 12.1    | 15.8         | 15.6    |
| 10 GC/GC | 14.7         | 14.5    | 16.0         | 14.9    |
| 11 CA/TG | 15.6         | 15.2    | 18.3         | 17.5    |
| 12 AC/GT | 14.3         | 13.9    | 21.1         | 21.1    |
| 13 CA/TG | 13.4         | 13.1    | 21.9         | 21.9    |
| 14 AG/CT | 14.3         | 14.1    | 19.6         | 19.5    |
| 15 GG/CC | 13.6         | 13.5    | 16.0         | 15.7    |
| 16 GT/AC | <b>10.6</b>  | 10.6    | 17.7         | 17.7    |
| 17 TA/TA | <b>9.1</b>   | 9.1     | 18.3         | 18.2    |
| 18 AA/TT | <b>8.9</b>   | 8.9     | 17.3         | 17.3    |
| 19 AA/TT | <b>9.3</b>   | 9.3     | 19.8         | 19.7    |
| 20 AA/TT | <b>9.1</b>   | 9.1     | 19.5         | 19.4    |
| 21 AA/TT | <b>9.0</b>   | 8.9     | 19.3         | 19.2    |
| 22 AG/CT | <b>10.2</b>  | 10.1    | 21.5         | 21.4    |
| 23 GG/CC | 12.1         | ---     | 17.9         | ---     |

**Table S4. Igf2 promoter sequences including binding motif and cloning sites**

Mouse\_Igf2\_P0\_promoter sequence

GCTAGCCCGGGCTCGAGCCCTAATTTGCATAAGCCACGCCCTTTTTTACCTGTGCCACGCCCA CAGACATTCCAGGGTGT CAGGTGACT  
GCCAGGTGTCAATCCAGTGAAGCCCCACCCACTCTCCACCCCTGCACATAGTCCCTACCCCTAGCTAACAGGAAGTGCTTCTAGCTTA  
ATTCAAACCTGCATAGACGCCTTCCTGTCTGT CAGGCAGGGGCCAAAGCCCCACCCTCTAATGCCCCATAACCCTAGTGTGGGAAAGCG  
CCATAGCCAGCTGCCCCATAAGTCTTTGCAGTACTTTACTGGCATATCATTTCCTCAAATTTGGAGGGGGCTGGAAGTGGGCGTGGAGGG  
GACGAGGTGAGGGATAAAAGCGTGGTGTCAATTCGAGCAGGTGCCTTACTCAGTGGAAAGCTTGGCATTCCGGTA

Chimp\_Igf2\_P0\_promoter sequence

GCTAGCCCGGGCTCGAGCCCCCCCATTTTTACCAGTGCCACGTCCACCAACATTCCGGGGTGTCAAGTAACTGCCAAGTGTCACTCTAA  
GTAAAGCTACACCCACTCCCCACCACCTCCACATAGCCCCACCTCCTAGCTGGCAGGGAGCTTCTGGCTTATGCCACGCCACAGGC  
GCCTTTCTGCCAGGT CAGGGGTGGGCCAAACCTCCACCCCTAATGTACCATGCCCTGGTGTCTGGAAAGTGCCTGAGCCAGCTGCCCA  
GCGGCCTCAGCACTACCAAGTTGGCACAAAGCTCCCCAAATTCGGAGGGGGCTCAGGGAAACGAGTGGAGGGGATGAGGAGGTGAGGGGT  
AAACCCATCATTTCAGTTGGCATTGAGCAGGTGCCATGCTCAGCAAGCTTGGCATTCCGGTA

Human\_Igf2\_P0\_promoter sequence

GCTAGCCCGGGCTCGAGCCCCCCGCATTTTTACCAGTGCCACGTCCACCAACATTCCAGGGTGTCAAGTAACTGCCAAGTGTCACTCTA  
AGTAAAGCTACACCCACTCCCCACCACCTCCACATAGCCCCACCTCCTAGCTGGCAGGGAGCTTCTGGCTTATGCCACGCCACAGG  
CGCCTTTCTGCCAGGT CAGGGGTGGGCCAAACCTCCACCCGCTAATGTACCATGCCCTGGTGTCTGGAAAGTGCCTGAGCCAGCTGCCCC  
AGCGGCCTCAGCACTACCAAGTTGGCACAAAGCTCCCCAAATTCGGAGGGGGCTCAGGGAAACGAGTGGAGGGGATGAGGAGGTGAGGGG  
TAAACCCATCATTTCAGTTGGCATTGAGCAGGTGCCATGCTCAGCGGAAGCTTGGCATTCCGGTA

RheMac\_Igf2\_P0\_promoter sequence

GCTAGCCCGGGCTCGAGTATTCCTCCACATTTTTACCAGTGCCACGCCCAACCAACATTCCAGGGTGTCAAGTAACTGCCAAGTGTCACT  
CTAAGTAGAGCTACACCCACTCCCCACTACCTCCACATAGCCCCACCTCCTGGCAGGCAGGGGGCTTCTGGCTTATACCCACGCCAC  
AGGCGCCTTTCTGCCAGGT CAGAGGTGGGCCAAACCTCCATCCCCTAATGCACCATGCCCTGGTGTCTGGAAAGTGCCTGAGCCAGCTGC  
CCCAGCGCCTCAGCACTACCAAGTTGGCACAAAGCTCCCCAAATTTGGAGGGGGCTCAGGGAAAGGAGTGGAGGGGAAGAGGAGGTGAG  
GGGTGAACCCATCATTTCAGTTGGCATTGAGCAGGTGCCATGCTCAAGCTTGGCATTCCGGTA
