# Supplementary material
Source: PubMed Central journal article supplement (PMC5877318)

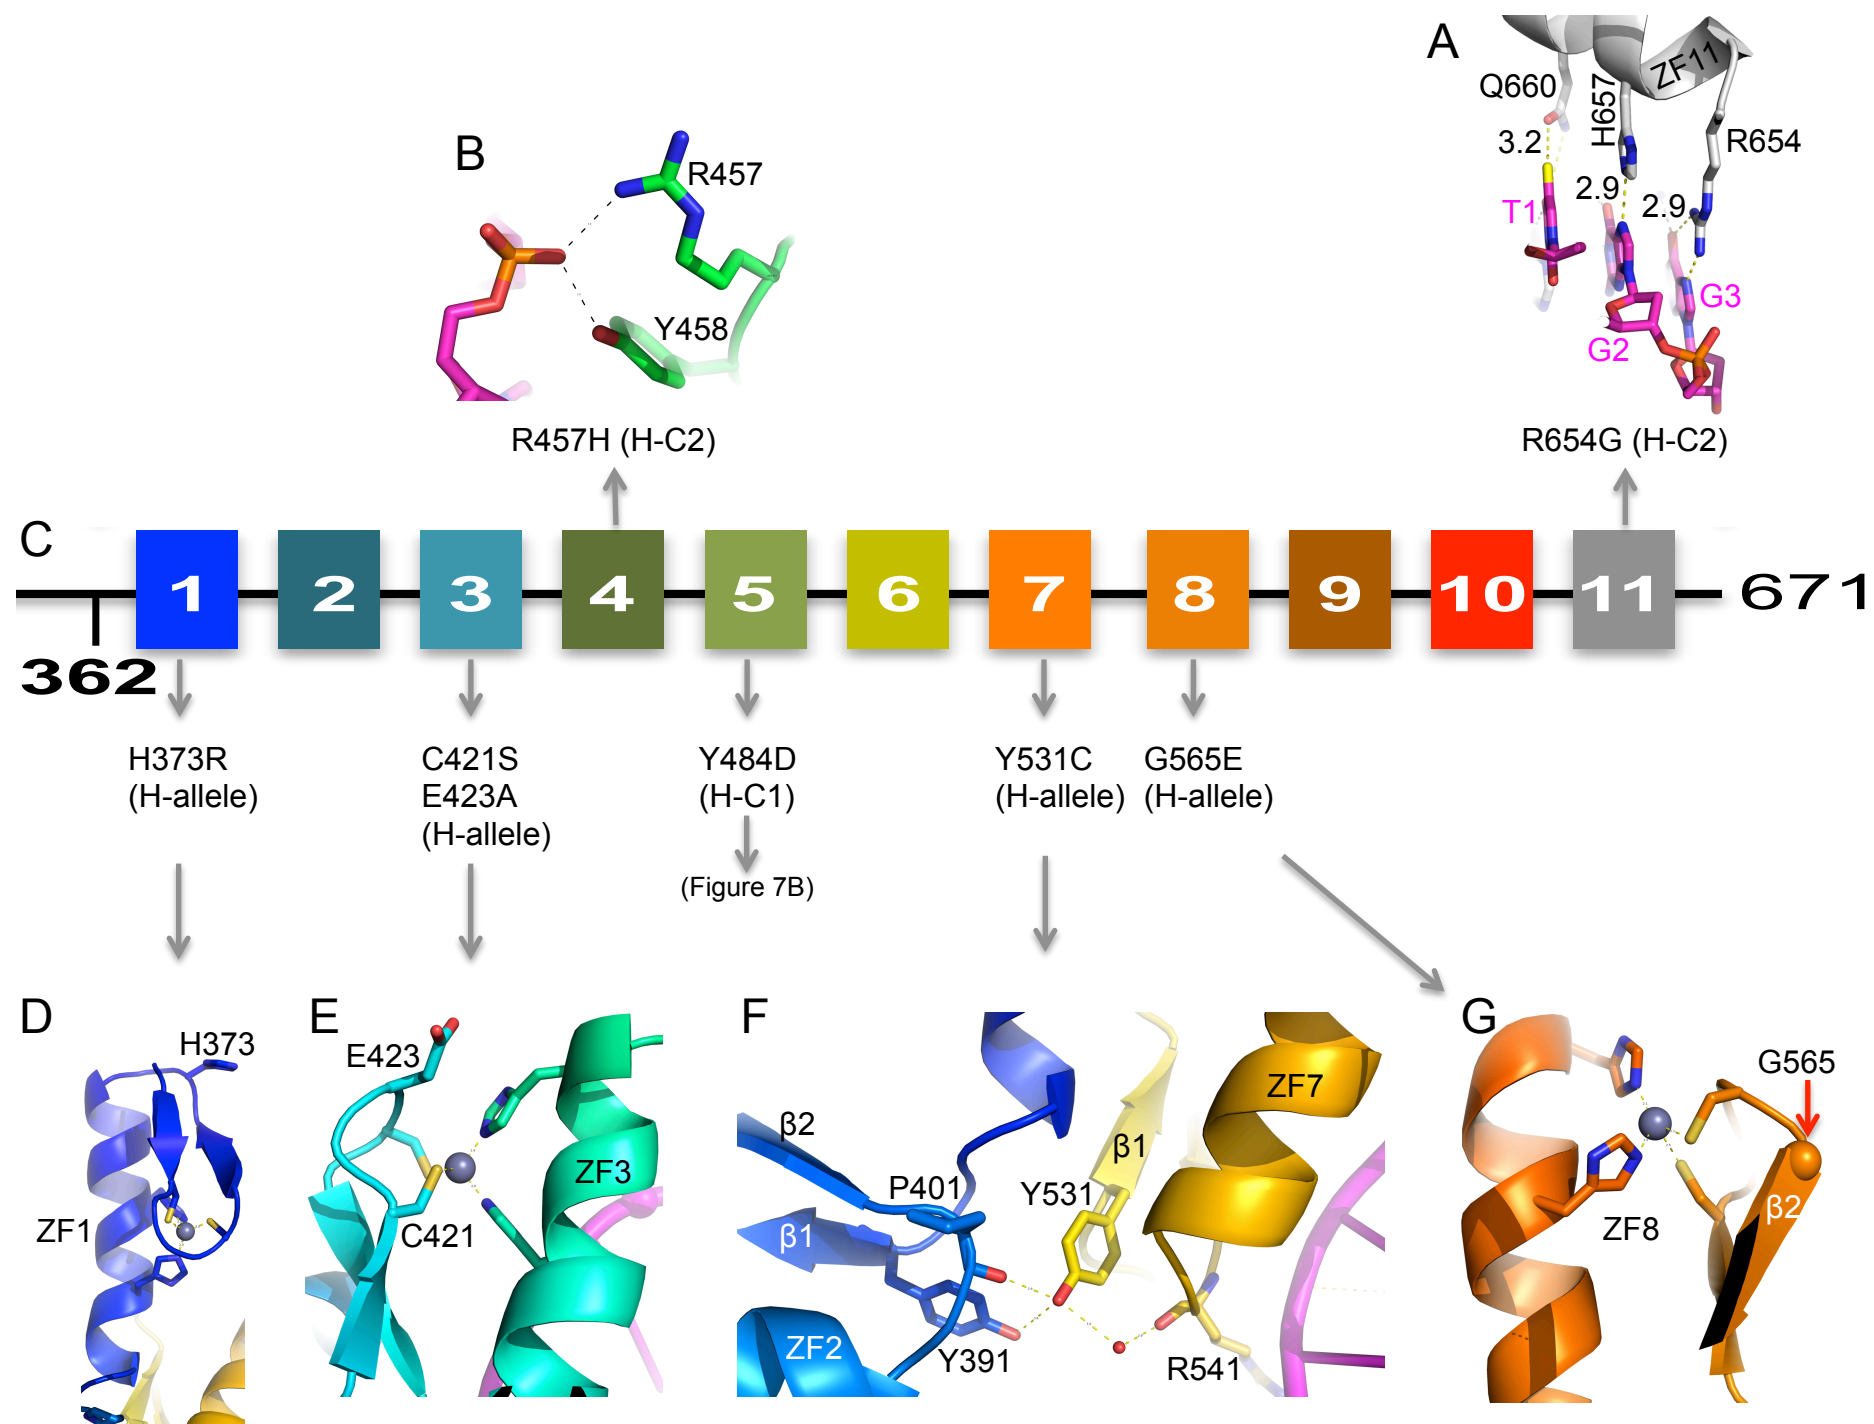

Supplement: NIHMS947537-supplement-3.pdf [file NIHMS947537-supplement-3.pdf]

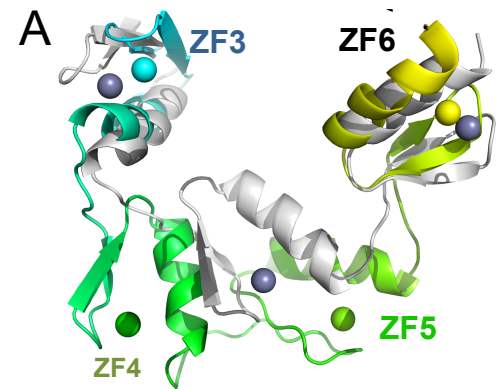

Colored: mZfp568; Grey: 3-finger PRDM9A

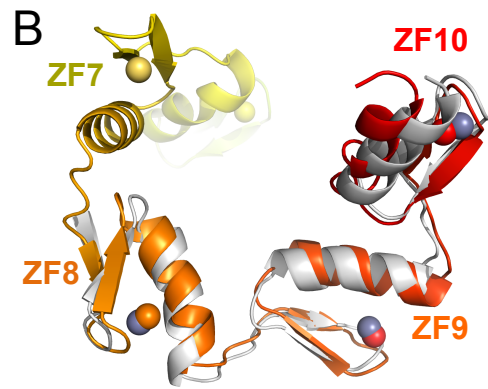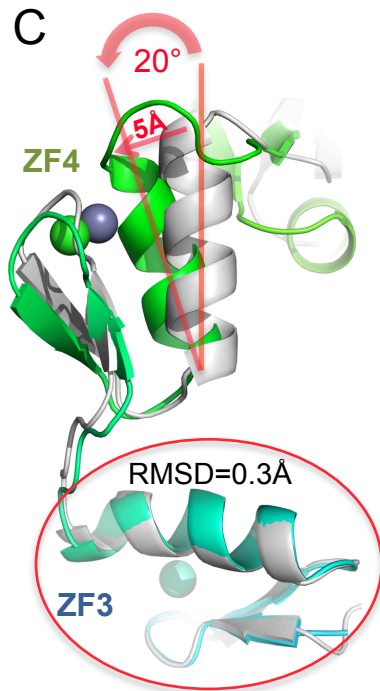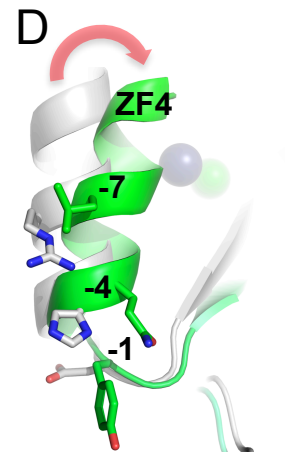

Colored: mZfp568  
Grey: PRDM9A

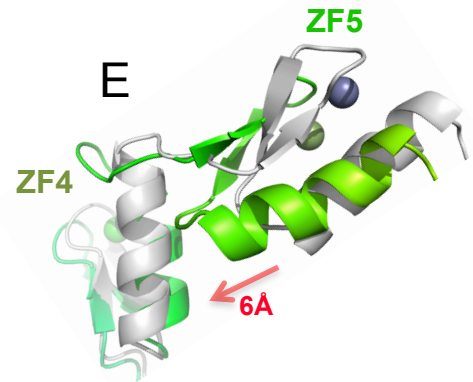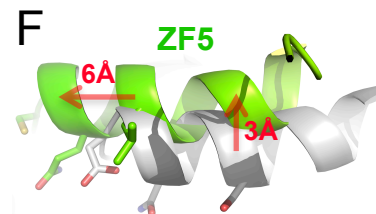

Supplement: NIHMS947537-supplement-5.pdf [file NIHMS947537-supplement-5.pdf]

A

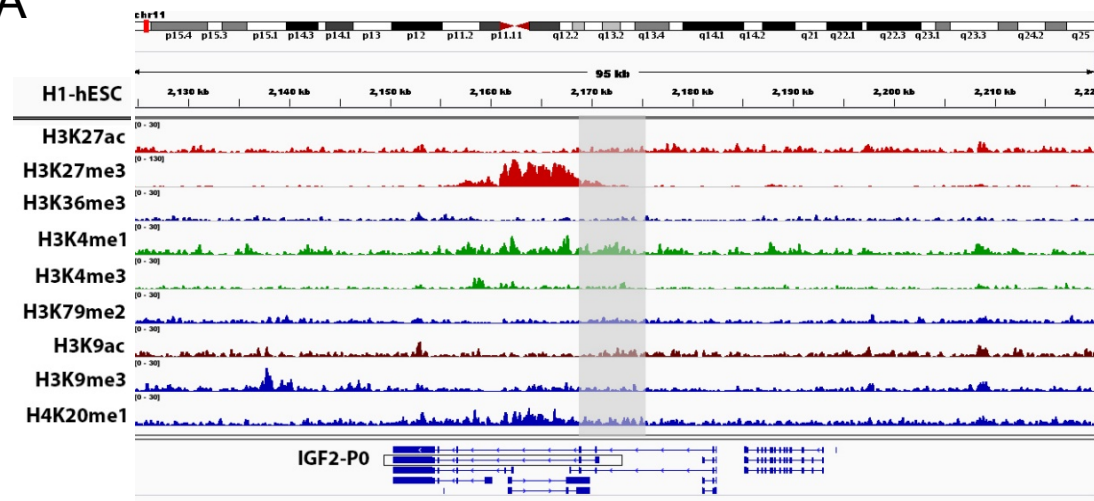

B

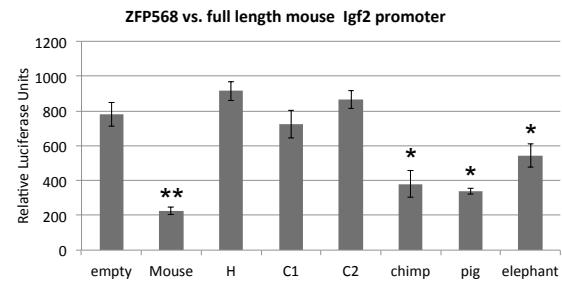

C

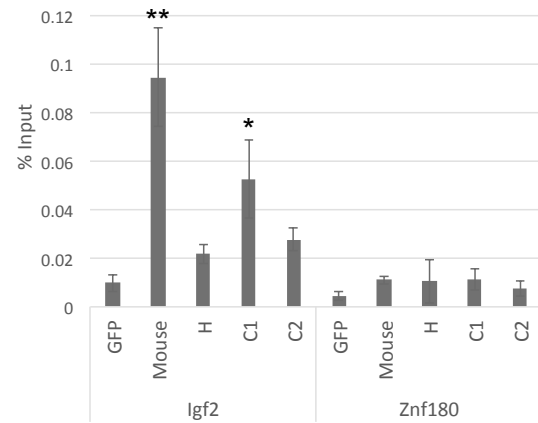

D

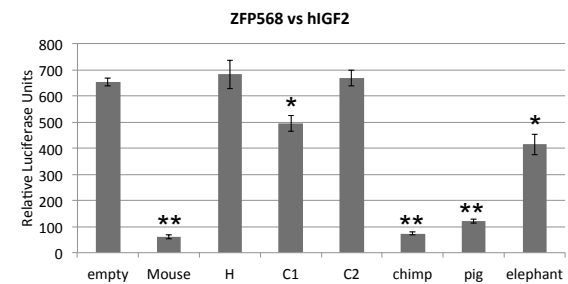

E

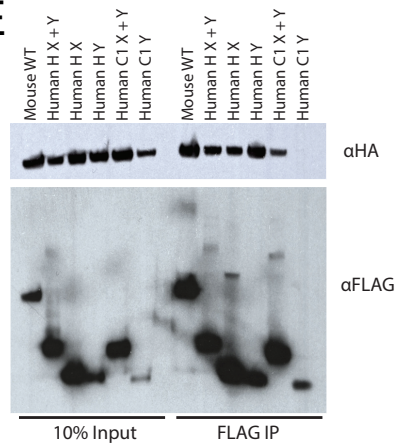

F

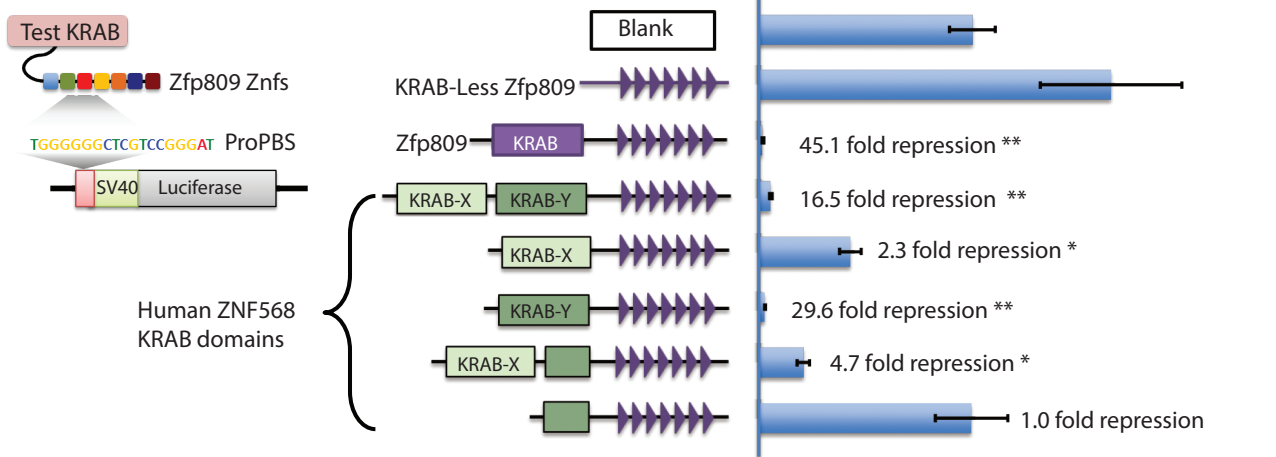

Supplement: NIHMS947537-supplement-6.pdf [file NIHMS947537-supplement-6.pdf]
